# Supplementary material
Source: Springer Nature journal article supplement (https://www.springermedizin.de/resource/supplementary/12958_2010_811_MOESM7_ESM.pdf/9568904)

# FSHR

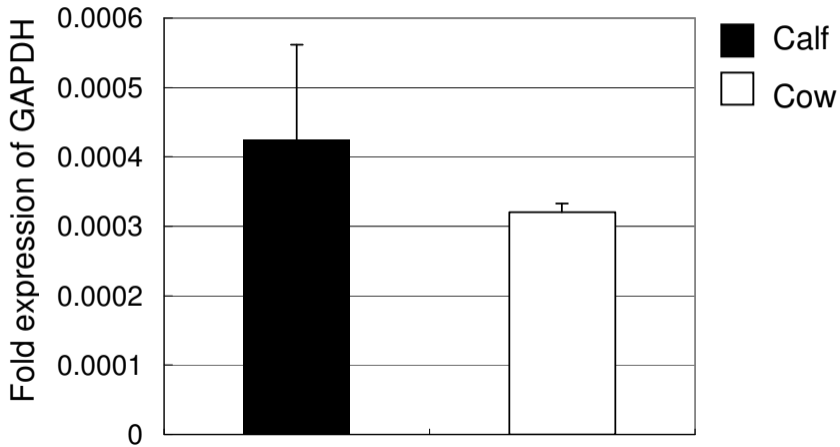

Supplement: MOESM7 [file 9568904]
